1 **Avian keratin disorder of Alaska black-capped chickadees is associated with Poecivirus**  
2 **infection**

3 Maxine Zylberberg<sup>a</sup>, Caroline Van Hemert<sup>b</sup>, Colleen M. Handel<sup>b</sup>, Joseph L. DeRisi<sup>c,d</sup>

4

5 <sup>a</sup>Department of Biochemistry and Biophysics, University of California, San Francisco, San  
6 Francisco, California 94158

7 <sup>b</sup>U. S. Geological Survey, Alaska Science Center, Anchorage, Alaska 99508

8 <sup>c</sup>Department of Pathology, University of California, San Francisco, San Francisco, California,  
9 94143

10 <sup>d</sup>Chan Zuckerberg Biohub, San Francisco, California, USA

11

12 Email addresses:

13 M. Zylberberg: [MaxineZylberberg@gmail.com](mailto:MaxineZylberberg@gmail.com)

14 C. Van Hemert: [cvanhemert@usgs.gov](mailto:cvanhemert@usgs.gov)

15 C.M. Handel: [cmhandel@usgs.gov](mailto:cmhandel@usgs.gov)

16 J.L. DeRisi: [joe@derisilab.ucsf.edu](mailto:joe@derisilab.ucsf.edu)

17 Corresponding authors: M. Zylberberg, J. DeRisi

18

19

## 20 **ABSTRACT**

### 21 **Background**

22 Avian keratin disorder (AKD) is an epizootic of debilitating beak deformities, first documented  
23 in black-capped chickadees (*Poecile atricapillus*) in Alaska during the late 1990s. Similar  
24 deformities have now been recorded in dozens of species of birds across multiple continents.  
25 Despite this, the etiology of AKD has remained elusive, making it difficult to assess the impacts  
26 of this disease on wild populations. We previously identified an association between infection  
27 with a novel picornavirus, Poecivirus, and AKD in a small cohort of black-capped chickadees.

### 28 **Methods**

29 To test if the association between Poecivirus and AKD holds in a larger study population, we  
30 used targeted PCR followed by Sanger sequencing to screen 124 symptomatic and asymptomatic  
31 black-capped chickadees for Poecivirus infection. We further compared the efficacy of multiple  
32 non-terminal field sampling methods (buccal swabs, cloacal swabs, fecal samples, and blood  
33 samples) for Poecivirus screening. Finally, we used both *in situ* hybridization and a strand-  
34 specific expression assay to localize Poecivirus to beak tissue of AKD-positive individuals and  
35 to determine if virus is actively replicating in beak tissue.

### 36 **Results**

37 Poecivirus was detected in 29/29 (100%) individuals with AKD, but only 9/95 (9.5%)  
38 asymptomatic individuals with apparently normal beaks ( $p < 0.0001$ ). We found that cloacal  
39 swabs are the most sensitive of these sample types for detecting Poecivirus in birds with AKD,

40 but that buccal swabs should be combined with cloacal swabs in evaluating the infection status  
41 of asymptomatic birds. Finally, we used both *in situ* hybridization and a strand-specific  
42 expression assay to localize Poecivirus to beak tissue of AKD-positive individuals and to provide  
43 evidence of active viral replication.

#### 44 **Conclusion**

45 The data presented here show a strong, statistically significant relationship between Poecivirus  
46 infection and AKD, and provide evidence that Poecivirus is indeed an avian virus, infecting and  
47 actively replicating in beak tissue of AKD-affected BCCH. Taken together, these data  
48 corroborate and extend the evidence for a potential causal association between Poecivirus and  
49 AKD in the black-capped chickadee. Poecivirus continues to warrant further investigation as a  
50 candidate agent of AKD.

51 **KEYWORDS:** avian keratin disorder, Poecivirus, beak, deformity, black-capped chickadee,  
52 *Poecile atricapillus*, emerging disease, keratin, passerine, Picornavirus

## 53 **BACKGROUND**

54 In recent years, beak deformities have been documented in dozens of avian species across  
55 continents. Birds afflicted by this disease, called avian keratin disorder (AKD), develop beak  
56 deformities characterized by elongation and often crossing and marked curvature (Figure 1) [1].  
57 These deformities result in decreased ability to feed and preen, changes in diet, and higher  
58 susceptibility to infection with a variety of parasites and pathogens, and ultimately lead to  
59 decreased fitness and survival [1-5]. While the population-level impacts of AKD remain  
60 uncertain, the high prevalence, fitness impacts, and widespread nature of AKD among multiple  
61 host species raise concern that this pathology could have broad-ranging and negative impacts on  
62 wild bird populations [1, 6, 7].

63 AKD was first documented among black-capped chickadees (BCCH, *Poecile*  
64 *atricapillus*) in Alaska in the late 1990s [1], with an average prevalence of 6.5% in adult Alaskan  
65 BCCH. Meanwhile, morphologically similar deformities have been documented in more than 40  
66 avian species in North America and over 30 species in the United Kingdom [1, 8-10]. Such  
67 deformities appear to be particularly common in corvids (such as the northwestern crow [*Corvus*  
68 *caurinus*] in North America and the rook [*C. frugilegus*] in the United Kingdom); cavity-nesting  
69 passerines (such as BCCH and the red-breasted nuthatch [*Sitta canadensis*] in North America  
70 and the Eurasian blue tit [*Cyanistes caeruleus*] in the United Kingdom); and raptors in North  
71 America [1, 6]. Despite the similarity of the gross pathology observed across species, it is  
72 unknown if a common factor is responsible. This is partly because the cause of AKD has  
73 remained elusive for over two decades [3, 7].

74 The identification of the causative agent of AKD is necessary to determine whether the  
75 beak pathologies observed across species represent a multi-species epizootic. Furthermore,

76 knowing the etiologic agent will allow scientists to determine the prevalence of this disease and  
77 evaluate its impact on avian populations apart from other potential causes of gross beak  
78 abnormalities. Indeed, a variety of factors can contribute to beak deformities, including  
79 environmental contaminants, nutritional deficiencies, trauma, and exposure to infectious agents  
80 [11]. However, over the years, multiple studies failed to find clear evidence of contaminant  
81 exposure, a nutrient deficiency, or bacterial or fungal infection underlying AKD [3, 12]. In 2016,  
82 we used unbiased, high-throughput metagenomic sequencing of beak tissue from BCCH affected  
83 by AKD to identify Poecivirus, a candidate agent. Poecivirus is most closely related to avian  
84 picornaviruses, but represents a novel viral genus [7]. Subsequent screening of 28 BCCH  
85 revealed that 19/19 of BCCH affected by AKD tested positive for Poecivirus, compared with  
86 only 2/9 asymptomatic individuals. These results suggested that Poecivirus merited further  
87 investigation as a candidate etiological agent of AKD in BCCH.

88         Our previous work indicated that in addition to beak tissues, Poecivirus could be detected  
89 in cloacal and buccal swabs, providing a non-terminal method of sampling individuals for  
90 infection, and a potential route to sampling a substantially larger number of individuals [7].  
91 Here, we apply these and other methods to further explore the association of Poecivirus and  
92 AKD. We tested a variety of samples (cloacal and buccal swabs, blood, and feces) from 29  
93 individuals affected by AKD and 95 asymptomatic control individuals for the presence of  
94 Poecivirus using targeted PCR primers followed by Sanger sequencing. In addition to increasing  
95 our sample size for correlation between AKD and Poecivirus, we used quantitative PCR (qPCR)  
96 to investigate the relationship between viral load in beak tissue and the extent of beak  
97 deformities observed in AKD cases. Finally, we used *in situ* hybridization to localize viral  
98 particles and a strand-specific gene expression assay to demonstrate the presence of replicating

99 virus in beak tissue of individuals with AKD. Taken together, the data presented here provide  
100 additional evidence to support our hypothesis that Poecivirus is a potential candidate etiological  
101 agent of AKD in black-capped chickadees.

102

## 103 **METHODS**

104 **Sample collection.** We tested 124 BCCH (29 individuals with AKD and 95  
105 asymptomatic control individuals) for the presence of Poecivirus using cloacal swabs. To obtain  
106 samples, individuals were captured using funnel traps and mist nets in Anchorage and the  
107 Matanuska-Susitna Valley, Alaska, during the non-breeding season in 2016 (March-April,  
108 October-December) and 2017 (March, April). Standard beak measurements were used to classify  
109 individuals as AKD-affected or unaffected [1]. Briefly, an individual was considered AKD-  
110 affected if it had a nares-to-tip length (chord measurement from anterior end of the right nares to  
111 the tip of the upper beak)  $\geq 8.25$  mm, an overbite or underbite of  $>1.0$  mm, or, in the case of  
112 specimens for which we had beak samples, if its beak exhibited evidence of hyperkeratosis at the  
113 cellular level [7]. We chose to use cloacal swabs because they are non-destructive and easily  
114 obtained, and we previously showed cloacal swabs to contain relatively high viral load [7]. In  
115 addition, we tested buccal swabs, blood samples, and fecal samples from a subset of individuals  
116 to compare the efficacy of a variety of non-terminal sample types for Poecivirus detection. We  
117 tested buccal swabs from 21 of the individuals with AKD and 75 of the control individuals. We  
118 tested blood samples collected by brachial venipuncture and fecal samples obtained  
119 opportunistically from subsets of individuals with AKD (N = 13 and N = 4, respectively). Swab,  
120 blood, and fecal samples (collected opportunistically if a bird defecated during handling) were  
121 placed in Longmire buffer [13] and stored frozen at  $-80^{\circ}\text{C}$  until processed.

122 For viral load determination, *in-situ* hybridization, and gene expression assay, we used  
123 samples remaining from our previous study [7], for which we obtained beak tissue samples from  
124 28 individuals. Nineteen of these exhibited AKD and were trapped using funnel traps and mist  
125 nets in Anchorage and the Matanuska-Susitna Valley, Alaska, during the non-breeding season  
126 from 2001–2015. Data on infection status of these individuals have been published previously.  
127 The 10 individuals with AKD that were collected from 2001–2010 were euthanized upon capture  
128 with isoflurane using the open-drop method and stored frozen at -20°C; the remaining 9  
129 specimens were captured in the winter of 2014 and spring of 2015, euthanized, and stored  
130 overnight at 4°C prior to necropsy, at which time portions of tissues were frozen at -80°C and  
131 additional samples were placed in formalin. From 2 of these, we collected cloacal and buccal  
132 swabs prior to euthanasia; swabs were stored in Longmire buffer [13]. Nine individuals not  
133 affected by AKD were collected opportunistically between 1995 and 2010 and stored frozen at -  
134 20°C; tissues from a subset of these individuals were used as negative controls in the gene  
135 expression assay measuring viral replication. Of the tissue samples collected from our previous  
136 study, we had adequate samples remaining from fifteen individuals that tested positive for  
137 Poecivirus; of these 14 exhibited AKD, and one was asymptomatic.

138 All work was conducted with the approval of the U. S. Geological Survey (USGS)  
139 Alaska Science Center Institutional Animal Care and Use Committee (Assurance #2016-14) and  
140 under appropriate state and federal permits.

141 **Testing for an association between Poecivirus and avian keratin disorder.** RNA was  
142 extracted from cloacal and buccal swab samples using a Zymo viral RNA kit. For each sample,  
143 75 µl of Longmire buffer was mixed with 225 µl of viral RNA buffer and the extraction  
144 proceeded as described in the manufacturer's protocol. RNA from tissue samples was extracted

145 using a Zymo quick RNA miniprep kit as previously described [7]. Following extraction, 200 ng  
146 of RNA were reverse transcribed in 10  $\mu$ l reactions containing 100 pmol random hexamer, 1 X  
147 reaction buffer, 5 mM dithiothreitol, 1.25 mM (each) deoxynucleoside triphosphates (dNTPs),  
148 and 100 U Superscript III (Life Technologies); mixtures were incubated at 25°C for 5 min, 42°C  
149 for 60 min, and 70°C for 15 min. Following reverse transcription, cDNA was screened via PCR  
150 using Poecivirus-specific primers (Additional File 1). Samples were initially screened via qPCR  
151 using primers Poeci\_7F and Poeci\_7R; samples with a positive result via qPCR were then  
152 subjected to PCR using the additional primer pairs to obtain longer amplicons that were Sanger  
153 sequenced to confirm the presence of Poecivirus. Quantitative PCR mixtures contained 1X  
154 LC480 Sybr Green master mix (Roche), 0.1  $\mu$ M Poeci\_7F, 0.1  $\mu$ M Poeci\_7R, and 5  $\mu$ l of 1:20-  
155 diluted cDNA. PCR mixtures contained 1X iProof master mix, 0.5  $\mu$ M primer, and 5  $\mu$ l sample  
156 template. Thermocycling consisted of 98°C for 30 sec, then 40–45 cycles of 98°C for 10 sec,  
157 58°C for 10 sec, and 72°C for 30 sec, then a 5 min elongation step of 72°C. Amplicons were  
158 visualized using agarose gels; those in the correct size range were purified using a DNA Clean  
159 and Concentrator kit or Zymoclean Gel DNA recovery kit (Zymo) and Sanger sequenced  
160 (Quintara Biosciences). We used likelihood ratio chi-square tests to test whether there was a  
161 difference in likelihood of infection with Poecivirus between AKD and control individuals.

162 **Viral load.** Quantitative PCR was conducted as described above and was used to  
163 determine viral load in beak samples from Poecivirus-positive individuals. For each sample, the  
164 cyclic threshold (Ct) value obtained using primers Poeci\_7F and Poeci\_7R ( $Ct_{\text{Poeci}}$ ) was  
165 normalized to the  $Ct_{\text{ref}}$  value obtained using primers to avian cellular RNA (avi\_8F, avi\_8R).  
166 Viral load was calculated using the equation  $\text{viral load} = 2^{(Ct_{\text{Poeci}} - Ct_{\text{ref}})}$ . We used linear regression  
167 to test for a relationship between beak length and viral load in Poecivirus-positive individuals.



168           **Virus localization of mRNA via *in situ* hybridization.** For mRNA *in situ* hybridization,  
169 we examined tissue from four of the individuals with the highest qPCR measured levels of  
170 Poecivirus in beak tissue. Beak tissue was collected and stored frozen at -80°C until processed;  
171 Tissue was fixed overnight in 4% paraformaldehyde at room temperature, and then decalcified  
172 for 2.5 weeks in 0.5 mM EDTA at 4°C. Decalcified tissue was frozen in Optimal Cutting  
173 Temperature (OCT) embedding media with dry ice and cut into 10 µm sections on a cryostat. *In*  
174 *situ* detection of mRNA was conducted using the RNAscope 2.5 High Definition (HD) Brown  
175 assay kit (Advanced Cell Diagnostics, Inc., Hayward, CA). The assay was conducted following  
176 the manufacturer's recommendations, with the exception that sections underwent a 45 min  
177 protease plus treatment in place of the recommended 30 min treatment. Images were captured  
178 with a Nikon Ti-E microscope fitted with a Nikon DS-Ri2 camera.

179           **Detection of viral replication.** The presence of negative strand virus was evaluated  
180 using the NanoString nCounter™ Elements system (NanoString, Seattle, WA) gene expression  
181 assay. Eight oligonucleotide probes were designed to target negative strand virus evenly  
182 distributed across the viral genome, 2 oligonucleotide probes were designed to target positive  
183 strand virus, and an additional 2 oligonucleotide probes were designed to target a BCCH  
184 housekeeping gene, NADH ND2 (GenBank: KF183899.1); oligonucleotide probes were  
185 obtained from IDT (Coralville, IA). Negative and positive strand virus genome segments were  
186 made using Gibson assembly cloning followed by transcription with T7 polymerase [14];  
187 equimolar pools of this RNA served as positive controls of probe activity. A 50 ng sample was  
188 hybridized with Tagsets (NanoString) and oligonucleotide probes at 65°C for 16 hours and the  
189 excess probes were washed away; in addition, a water negative control was run in one lane, and  
190 positive control RNA was run in each of four lanes, with 100, 1,000, 10,000, or 100,000 copies

191 of target RNA added to control lanes 1–4, respectively. The digital counts were captured by  
192 nCounter Digital Analyzer and the data were analyzed by nSolver Analysis Software  
193 (NanoString). Following standard NanoString analysis methods, individuals were considered to  
194 have a positive result for any single probe if that probe exhibited levels 2 standard deviations or  
195 greater above that of negative controls. We used linear regression to test for a relationship  
196 between beak length and viral RNA count in Poecivirus-positive individuals. Statistical analyses  
197 were conducted using JMP 7.0.1 by SAS (SAS Institute Inc., Cary, NC).

198

## 199 **RESULTS**

200       Among the BCCH with AKD, 29/29 (100%) individuals tested positive for Poecivirus by  
201 PCR of cDNA from buccal or cloacal swab samples or both. Only 9/95 (9.5%) control  
202 individuals tested positive for the presence of Poecivirus (Figure 2). Of note, follow-up data are  
203 available for four of the asymptomatic control individuals that tested positive for Poecivirus. One  
204 of these (1/4, 25%) had developed an elongated beak typical of AKD when recaptured 6 months  
205 later (beak length of 12.5 mm). The other three birds (3/4, 75%) did not show evidence of  
206 elongated beaks when recaptured 6–12 months after testing positive for Poecivirus; their  
207 maximum subsequent beak lengths were 7.8, 7.4, and 7.1 mm (we do not have subsequent data  
208 on Poecivirus infection status).

209       Among the BCCH with AKD, 28/29 (96.6%) tested positive via cloacal swab. In  
210 comparison, 3/29 (10.4%) individuals with AKD tested positive for Poecivirus via buccal swab,  
211 one of these having tested negative via cloacal swab (Table 1). Among the asymptomatic control  
212 BCCH, 5/95 (5.3%) individuals tested positive for Poecivirus via cloacal swab, 4/75 (5.3%)

213 tested positive via buccal swab, and none tested positive via both cloacal and buccal swab. None  
214 of the blood samples (0/13) or fecal samples (0/4) from AKD-positive individuals tested positive  
215 for Poecivirus, despite 13/13 of these individuals testing positive for the presence of Poecivirus  
216 via cloacal and/or buccal swab. Overall, targeted PCR testing of cloacal swabs for the presence  
217 of Poecivirus resulted in most cases of Poecivirus detection, and were most consistent with our  
218 previous, beak tissue-based testing, which detected the presence of Poecivirus in 19/19 (100%)  
219 of AKD individuals tested [7]. However, cloacal and buccal swabs provided complementary  
220 information on the presence of Poecivirus in individuals without apparent beak deformities.

221 Individuals with AKD were significantly more likely to be infected with Poecivirus than  
222 expected by chance if we consider the swab data from the current study ( $p < 0.0001$ ,  $\chi^2 = 93.29$ ,  
223  $df = 1$ ,  $N = 124$ ) and when we combine the swab data from the current study with our previous  
224 data that tested individuals for Poecivirus using beak and cloacal tissue ( $p < 0.0001$ ,  $\chi^2 = 129.03$ ,  
225  $df = 1$ ,  $N = 150$ ; Figure 2) [7]. However, we found only a weak, if statistically significant,  
226 relationship between beak length and viral load in beak tissue ( $p = 0.026$ ,  $R^2_{adj} = 0.28$ ,  $F = 6.35$ ,  
227  $N = 15$ ; Figure 4; qPCR threshold cycle for viral detection ranged from 14.3-23.8).

228 We next sought to address the localization of Poecivirus at the site of pathology in AKD-  
229 affected individuals. Examination of beak tissue from four Poecivirus-infected individuals via  
230 RNAscope *in situ* hybridization revealed the presence of virus in the stratum germinativum and  
231 the stratum corneum (Figure 3). The same method failed to detect virus in the brain, liver, or  
232 gastrointestinal tract of one of these individuals in which we examined these tissues (data not  
233 shown).

234 As a positive strand virus, detection of Poecivirus negative strand is indicative of viral  
235 replication. To test for the presence of actively replicating virus, we carried out studies to

236 directly detect and quantify both negative and positive sense Poecivirus RNAs. We used a total  
237 of 8 probes to detect negative sense virus RNA, 2 probes for positive sense virus RNA, and 2  
238 probes for the BCCH housekeeping gene NADH ND2 (Figure 5). We detected expression of  
239 both positive and negative strand Poecivirus RNA in 11/11 Poecivirus-infected individuals  
240 (Figure 5). The probes for negative strand virus varied in their efficacy, detecting negative strand  
241 virus in 6–10 AKD individuals, although no probe to negative strand virus detected virus in  
242 every individual that tested positive for negative strand virus overall. One probe failed to detect  
243 virus in both the samples and the positive controls, including those that contained amounts of  
244 negative strand virus well above the stated minimum detection limits of the assay; as a result,  
245 this probe is absent from Figure 5. The number of negative strand RNAs normalized to the  
246 average number of BCCH NADH ND2 (when both probes to this gene were considered,  
247 GenBank: KF183899.1) ranged from 4.05E-04 to 1.13E-01. In comparison, the number of  
248 positive strand RNAs normalized to the average number of BCCH NADH ND2 was much  
249 higher, ranging from 1.09E-01 to 9.28E00. Neither negative nor positive strand RNAs explained  
250 a statistically significant amount of variation in beak length when normalized to average counts  
251 of the BCCH housekeeping gene (NADH ND2), ( $R^2_{\text{adj}} = 0.013$ , and  $R^2_{\text{adj}} < 0.0001$ ,  
252 respectively).

253

## 254 **DISCUSSION**

255 In this study, we investigated the relationship between Poecivirus and avian keratin  
256 disorder (AKD), a disease characterized by beak deformities that appears to affect a large  
257 number of species across multiple continents. We previously used next-generation sequencing to  
258 identify and characterize the full-length genome of Poecivirus, a novel picornavirus, present in a

259 small cohort of BCCH with AKD. Here we expand on that work, testing a substantially larger  
260 cohort of individuals (N = 124) for the presence of the virus. We demonstrated a statistically  
261 significant correlation between Poecivirus infection and AKD, with Poecivirus present in 29/29  
262 (100%) of AKD-affected BCCH, and 9/95 (9.5%) of control individuals. These results are  
263 consistent with those of our previous study, which found an identical prevalence of Poecivirus in  
264 AKD-affected birds (100% of 29) and a slightly higher but not statistically different prevalence  
265 among asymptomatic control individuals (22% of 9;  $p = 0.29$ ,  $\chi^2 = 1.14$ ,  $df = 1$ ). The slight  
266 discrepancy is likely attributable to the small sample size of control birds in our earlier study,  
267 although it could also reflect better detection of Poecivirus in sectioned tissue samples vs. swabs,  
268 or seasonal differences in disease spread or pathology, as has been documented in a variety of  
269 other infectious avian diseases (e.g., [15-20]).

270         The finding that some phenotypically AKD-asymptomatic (“control”) birds were positive  
271 for Poecivirus also merits further consideration. There are several potential explanations for this  
272 finding (for an in-depth discussion of this topic, see [7]). Briefly, the asymptomatic birds that  
273 tested positive for Poecivirus may have had subclinical infections (as has been suggested for  
274 related viruses [21]), or may have been in an early stage of infection, before sufficient time had  
275 passed for them to grow the elongated beak that defines AKD. Indeed, 1/4 (25%) individuals that  
276 tested positive for Poecivirus while apparently unaffected by AKD, and for which we have  
277 subsequent data, was later captured with an elongated beak. This individual was captured with a  
278 normal beak in April 2016 (beak length 7.4 mm) and tested positive for Poecivirus via cloacal  
279 swab; when recaptured 7 months later, it still tested positive for Poecivirus but now had a  
280 severely elongated beak (12.5 mm; we do not have data on the infection status of the other three  
281 birds upon recapture). Alternatively, it is possible that Poecivirus infection is not related to AKD;

282 however, the presence of Poecivirus in significantly more AKD-affected birds than unaffected  
283 individuals suggests either that it is the causative agent of AKD or that AKD promotes or  
284 increases susceptibility to Poecivirus.

285         While we previously detected Poecivirus in beak tissue of BCCH with AKD, it was  
286 unknown whether Poecivirus was infecting cells of the avian beak; therefore, it remained a  
287 possibility that Poecivirus was not an avian virus but was simply present in beak samples  
288 because of incidental contact with the virus, for example, via foraging. The *in situ* hybridization  
289 data presented here indicate that Poecivirus was present in cells of the stratum corneum and  
290 stratum germinativum in four individuals with AKD. These data must be considered preliminary  
291 as we were unable to test control individuals for the presence of Poecivirus in beak tissue;  
292 however, the presence of this virus in avian cells provides further evidence that Poecivirus is  
293 indeed an infectious avian virus rather than an incidental contaminant. This evidence that  
294 Poecivirus is an avian virus is consistent with phylogenetic analysis, which shows that  
295 Poecivirus' closest relatives are the avian megriviruses [7]. In addition, the presence of  
296 Poecivirus in beak tissue, but not other tissues (brain, liver, gastrointestinal tract), is in keeping  
297 with the focal pathology of AKD, which primarily affects beak tissue. Moreover, the localization  
298 of Poecivirus in the stratum germinativum, the layer of the beak that gives rise to keratin cells, is  
299 consistent with the pathology of AKD, which is characterized by overgrowth of the keratin layer  
300 of the beak. Our previous study detected low levels of virus in brain, liver, and gastrointestinal  
301 tract; however, it is possible that the virus was present in these tissues incidentally and was not  
302 actively replicating.

303         The gene expression data presented here indicate that Poecivirus is actively replicating in  
304 avian beak tissue. Poecivirus, like other picornaviruses, is a nonenveloped single stranded

305 positive sense RNA virus. As with other picornaviruses, the Poecivirus genome encodes for an  
306 RNA-dependent RNA polymerase that makes complementary minus strands of RNA during viral  
307 replication [22]. These negative strand RNAs are only present during viral replication. Therefore,  
308 the presence of negative strand Poecivirus RNA in the beak tissue of all AKD-affected  
309 individuals tested (11/11) strongly suggests that Poecivirus was actively replicating in these  
310 individuals.

311 Our data suggest that field studies of Poecivirus and AKD would benefit by combining  
312 both cloacal and buccal swabs to test for the presence of Poecivirus in wild avian populations  
313 (Table 1). Cloacal swabs performed best in non-terminal field-based sampling of AKD  
314 individuals for the presence of Poecivirus; cloacal swabs detected Poecivirus in 28/29 (96.6%) of  
315 AKD birds. Meanwhile, buccal swabs appear to be prone to type II error (false negatives) in  
316 individuals with AKD, detecting Poecivirus in only 3/21 (14.3%) AKD individuals tested;  
317 however, one of these individuals tested negative for the presence of Poecivirus via cloacal swab,  
318 indicating that combining the two methods could provide additional information. In contrast, 4/9  
319 (44%) control individuals that tested positive for Poecivirus did so via buccal swab only. The  
320 difference in efficacy of the two swab types for detecting Poecivirus between AKD and control  
321 individuals is intriguing; future studies should investigate whether this difference has a biological  
322 basis. For example, detection of Poecivirus in cloacal swabs may require viral shedding, which  
323 could increase later in infection, once the elongated beak has had time to develop. While we  
324 tested a relatively small number of blood and fecal samples for the presence of Poecivirus,  
325 neither of these sample types showed promise for Poecivirus detection; this could be the result of  
326 PCR inhibitors known to be present in both feces and blood [23].

327

328 **CONCLUSIONS**

329 Poecivirus continues to warrant further investigation as a candidate agent of AKD. The  
330 data presented here show a strong, statistically significant relationship between Poecivirus  
331 infection and AKD, and provide evidence that Poecivirus is indeed an avian virus, infecting and  
332 actively replicating in beak tissue of AKD-affected BCCH. Cloacal and buccal swabs provide a  
333 promising method for non-terminal field-testing of wild birds for the presence of Poecivirus, and  
334 a way forward for future studies of the impacts of this pathogen on the ecology and fitness of  
335 wild bird populations. Ultimately, a viral challenge of healthy individuals with Poecivirus is  
336 needed to determine with certainty the role of Poecivirus in AKD and will allow us to better  
337 understand the impact of this disease on avian populations worldwide.

338

339 **LIST OF ABBREVIATIONS**

340 AKD: avian keratin disorder

341 BCCH: black-capped chickadee (*Poecile atricapillus*)

342

343 **DECLARATIONS**

344 Ethics approval and consent to participate: All work was conducted with the approval of the U.

345 S. Geological Survey (USGS) Alaska Science Center Institutional Animal Care and Use

346 Committee (Assurance #2016-14) and under appropriate state and federal permits.

347 Consent for publication: Not applicable

348 Availability of data and material: The datasets generated and/or analyzed during the current

349 study are available in [24].

350 Competing interests: The authors declare that they have no competing interests.



351 Funding:

352 A National Science Foundation Postdoctoral Research Fellowship (M.Z.)

353 The Howard Hughes Medical Institute (J.L.D.)

354 U. S. Geological Survey through the Wildlife Program of the Ecosystems Mission Area (C.M.H.,

355 C.V.)

356 The Chan Zuckerberg Biohub (J.L.D.)

357 The funders had no role in study design, data collection and interpretation, or the decision  
358 to submit the work for publication. Any use of trade, product, or firm names in this publication is  
359 for descriptive purposes only and does not imply endorsement by the U. S. Government.

360

361 Authors' contributions: M.Z. participated in the conception, design, and coordination of the

362 study, performed lab work and data analyses, and wrote and revised the manuscript; C.V.

363 participated in the conception, design, and coordination of the study, collected the samples, and

364 participated in revising the manuscript; C.M.H. and J.D. oversaw the conception and design of

365 the project, supervised its execution and participated in revising the manuscript.

366

367 Acknowledgments: We thank Hannah Retallack, Christopher Liverman, and Caleigh Mandel-

368 Brehm for laboratory assistance; Kristeene Knopp, Amy Kistler, and Andrew Reeves for

369 comments on an earlier version of this manuscript; Jennifer Mann for logistical assistance; and

370 Lisa Pajot, Rachel Richardson, and numerous volunteers for assistance with sample collections.

371

372

373



375 **Figure 1.** Avian keratin disorder. Panel A) BCCH with a normal beak; photo by John Schoen.  
376 Panel B) BCCH exhibiting beak overgrowth characteristic of AKD; photo by Martin Renner.

377

378 **Figure 2.** Association between Poecivirus and AKD in BCCH. Y-axis shows the number of  
379 individuals tested with a given beak length; individuals testing negative for Poecivirus are  
380 highlighted in blue and those testing positive for Poecivirus are in orange. Note that the x-axis is  
381 not to scale (beak lengths for which we had no individual data are excluded from the graph).  
382 Individuals to the right of the vertical line are classified as having AKD based on beak length or  
383 morphology. The hatched data point represents the single individual with an apparently normal  
384 beak that tested positive for Poecivirus and later developed an elongated beak; this is the only  
385 individual represented twice on the graph and the data points are linked by a dashed line, with  
386 the arrow pointing to the later beak measurement.

387

388 **Figure 3.** Viral localization. Transverse sections of beak of BCCH displaying AKD (beak length  
389 of 18.7 mm) and infected with Poecivirus, as determined by targeted PCR followed by Sanger  
390 sequencing. Cell nuclei are stained blue with hematoxylin and RNA sequence specific probes are  
391 stained brown. Panel A) section hybridized with probe for DapB bacterial gene (negative  
392 control); B) section hybridized with probe for BCCH NADH ND2 gene (positive control); C)  
393 section hybridized with probe for Poecivirus; D) inset of Panel C.

394

395 **Figure 4.** Viral load and beak length. Relative levels of viral RNA in beaks from Poecivirus-  
396 infected BCCH individuals were measured by qRT-PCR. Levels were normalized to levels of

397 avian cellular RNA. Individuals with AKD are represented by grey diamonds, the single  
398 asymptomatic individual is shown in black.

399

400 **Figure 5.** Viral replication. Relative levels of positive (pluses) and negative strand (diamonds)  
401 viral RNA in beaks from Poecivirus-infected BCCH (N = 11) were measured by a strand-specific  
402 gene expression assay. Levels were normalized to levels of avian cellular RNA. The presence of  
403 negative strand RNA indicates active viral replication. One probe to negative strand virus failed,  
404 and so does not appear in the graph. Probes are referred to by the position of the target  
405 nucleotides (nt) in the Poecivirus genome.

406

407

408

- 409 1. Handel CM, Pajot LM, Matsuoka SM, Hemert CV, Terenzi J, Talbot SL, Mulcahy DM, Meteyer CU,  
410 Trust KA: **Epizootic of beak deformities among wild birds in Alaska: An emerging disease in**  
411 **North America?** *Auk* 2010, **127**:882–898.
- 412 2. Van Hemert C, Handel CM, O'Hara TM: **Evidence of accelerated beak growth associated with**  
413 **avian keratin disorder in black-capped chickadees (*Poecile atricapillus*).** *Journal of Wildlife*  
414 *Diseases* 2012, **48**:686-694.
- 415 3. Van Hemert C, Armien AG, Blake JE, Handel CM, O'Hara TM: **Macroscopic, histologic, and**  
416 **ultrastructural lesions associated with avian keratin disorder in black-capped chickadees**  
417 **(*Poecile atricapillus*).** *Veterinary Pathology Online* 2013.
- 418 4. D'Alba L, Van Hemert C, Spencer KA, Heidinger BJ, Gill L, Evans NP, Monaghan P, Handel CM,  
419 Shawkey MD: **Melanin-based color of plumage: Role of condition and of feathers'**  
420 **microstructure.** *Integrative and Comparative Biology* 2014, **54**:633-644.
- 421 5. Wilkinson LC, Handel CM, Van Hemert C, Loiseau C, Sehgal RNM: **Avian malaria in a boreal**  
422 **resident species: Long-term temporal variability, and increased prevalence in birds with avian**  
423 **keratin disorder.** *International Journal for Parasitology* 2016, **46**:281-290.
- 424 6. Van Hemert C, Handel C: **Beak deformities in northwestern crows: evidence of a multispecies**  
425 **epizootic.** *Auk* 2010, **127**:746–751.
- 426 7. Zylberberg M, Van Hemert C, Dumbacher JP, Handel CM, Tihan T, DeRisi JL: **Novel picornavirus**  
427 **associated with avian keratin disorder in Alaskan birds.** *mBio* 2016, **7**.
- 428 8. **Big Garden Beak Watch Results** [[http://www.bto.org/volunteer-](http://www.bto.org/volunteer-surveys/gbw/about/background/projects/bgbw/results/species)  
429 [surveys/gbw/about/background/projects/bgbw/results/species](http://www.bto.org/volunteer-surveys/gbw/about/background/projects/bgbw/results/species)]
- 430 9. Harrison T: **Beak deformities of garden birds.** *British Birds* 2011, **104**:538-541.
- 431 10. Craves J: **Passerines with deformed bills.** *North American Bird Bander* 1994, **19**:14-18.
- 432 11. Tully T, Jr, Lawton M, Dorrestein G: *Handbook of Avian Medicine*. 2nd edition edn. New York,  
433 NY: Butterworth-Heinemann, Elsevier Science Limited; 2000.
- 434 12. Handel CM, Van Hemert C: **Environmental contaminants and chromosomal damage associated**  
435 **with beak deformities in a resident North American passerine.** *Environ Toxicol Chem* 2015,  
436 **34**:314-327.
- 437 13. Longmire JL, Lewis AK, Brown NC, Buckingham JM, Clark LM, Jones MD, Meincke LJ, Meyne J,  
438 Ratliff RL, Ray FA, et al: **Isolation and molecular characterization of a highly polymorphic**  
439 **centromeric tandem repeat in the family falconidae.** *Genomics* 1988, **2**:14-24.
- 440 14. Gibson DG, Young L, Chuang R-Y, Venter JC, Hutchison CA, Smith HO: **Enzymatic assembly of**  
441 **DNA molecules up to several hundred kilobases.** *Nat Meth* 2009, **6**:343-345.
- 442 15. Altizer S, Dobson A, Hosseini P, Hudson P, Pascual M, Rohani P: **Seasonality and the dynamics of**  
443 **infectious diseases.** *Ecology Letters* 2006, **9**:467-484.
- 444 16. Cornelius J, Zylberberg M, Breuner C, Gleiss AC, Hahn T: **Assessing the role of reproduction and**  
445 **stress in the spring emergence of Haematozoan parasites in birds.** *The Journal of Experimental*  
446 *Biology* 2014, **217**:841-849.
- 447 17. Zylberberg M, Lee KA, Klasing KC, Wikelski M: **Increasing avian pox prevalence varies by**  
448 **species, and with immune function, in Galápagos finches.** *Biological Conservation* 2012,  
449 **153**:72-79.
- 450 18. Zylberberg M, Lee KA, Klasing KC, Wikelski M: **Variation with land use of immune function and**  
451 **prevalence of avian pox in Galapagos finches.** *Conservation Biology* 2013, **27**:103-112.
- 452 19. Wang R-H, Jin Z, Liu Q-X, van de Koppel J, Alonso D: **A simple stochastic model with**  
453 **environmental transmission explains multi-year periodicity in outbreaks of avian flu.** *PLoS ONE*  
454 2012, **7**:e28873.

- 455 20. Jahangir A, Ruenphet S, Ueda S, Ueno Y, Shoham D, Shindo J, Okamura M, Nakamura M,  
456 Takehara K: **Avian influenza and Newcastle disease viruses from northern pintail in Japan:**  
457 **Isolation, characterization and inter-annual comparisons during 2006–2008.** *Virus Research*  
458 2009, **143**:44-52.
- 459 21. Boros Á, Nemes C, Pankovics P, Kapusinszky B, Delwart E, Reuter G: **Identification and complete**  
460 **genome characterization of a novel picornavirus in turkey (Meleagris gallopavo).** *Journal of*  
461 *General Virology* 2012, **93**:2171-2182.
- 462 22. Ehrenfeld E, Domingo E, Roos RP: *The Picornaviruses*. Washington, DC: American Society for  
463 Microbiology Press; 2010.
- 464 23. Rådström P, Knutsson R, Wolffs P, Lövenklev M, Löfström C: **Pre-PCR processing.** *Molecular*  
465 *Biotechnology* 2004, **26**:133-146.
- 466 24. Zylberberg M, C. Van Hemert, C.M. Handel, and J.L. DeRisi.: **Genetic data associated with avian**  
467 **keratin disorder and Poecivirus in black-capped chickadees, Alaska, 2016-2017.** (release USGS  
468 ed.; 2018.

469

470

471 **Additional files:**

472 File name: Additional\_file\_1.pdf

473 File format: .pdf

474 Title of data: PCR primers

475 Description of data: PCR primers used to detect Poecivirus

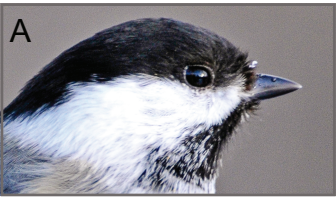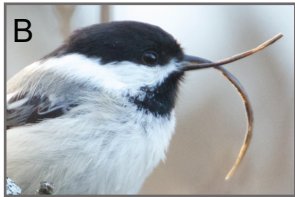

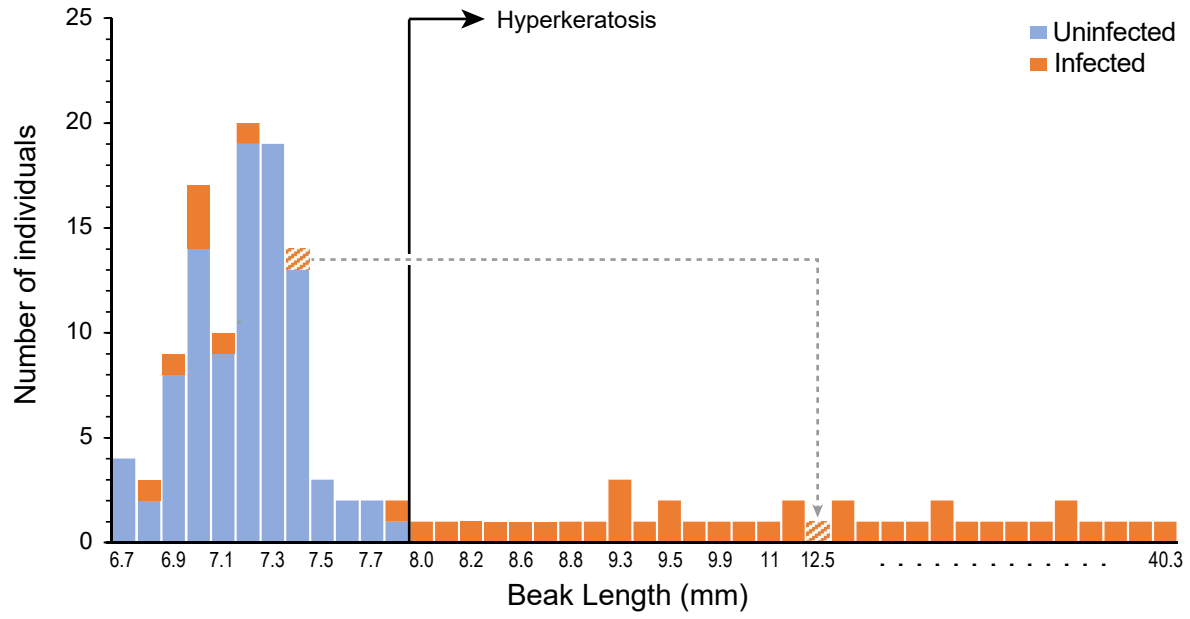



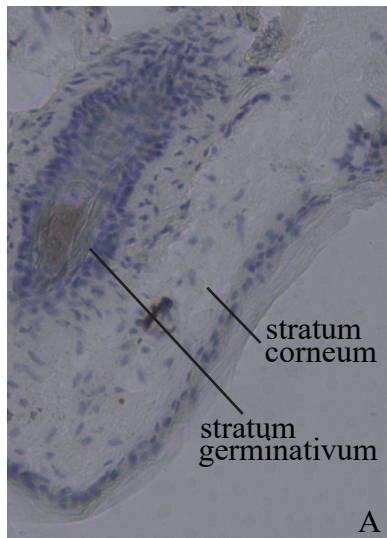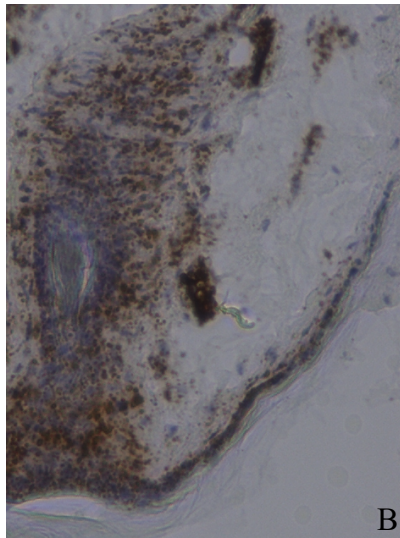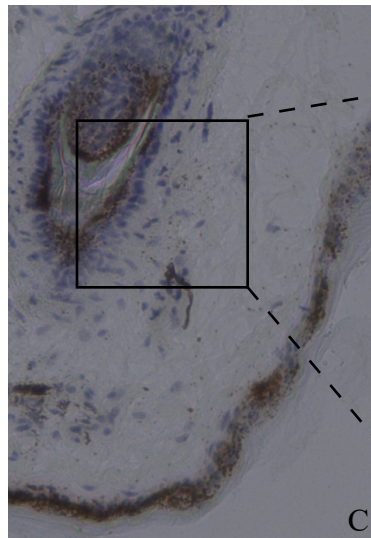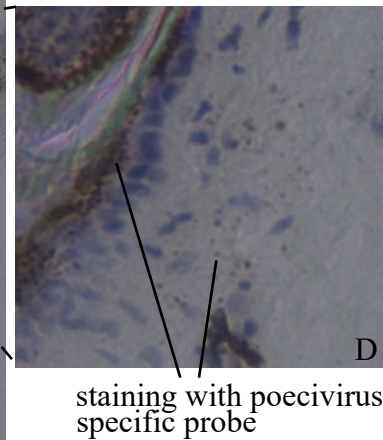

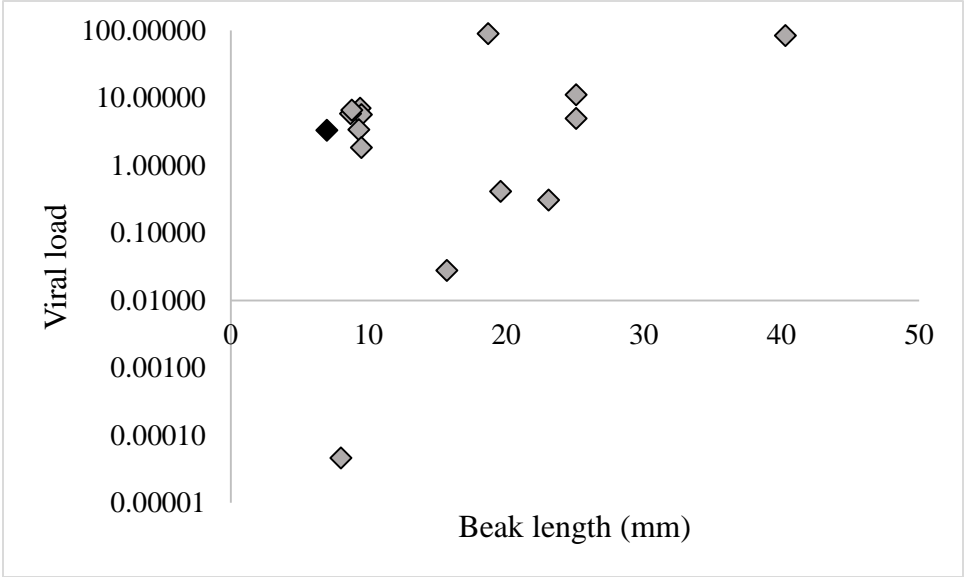

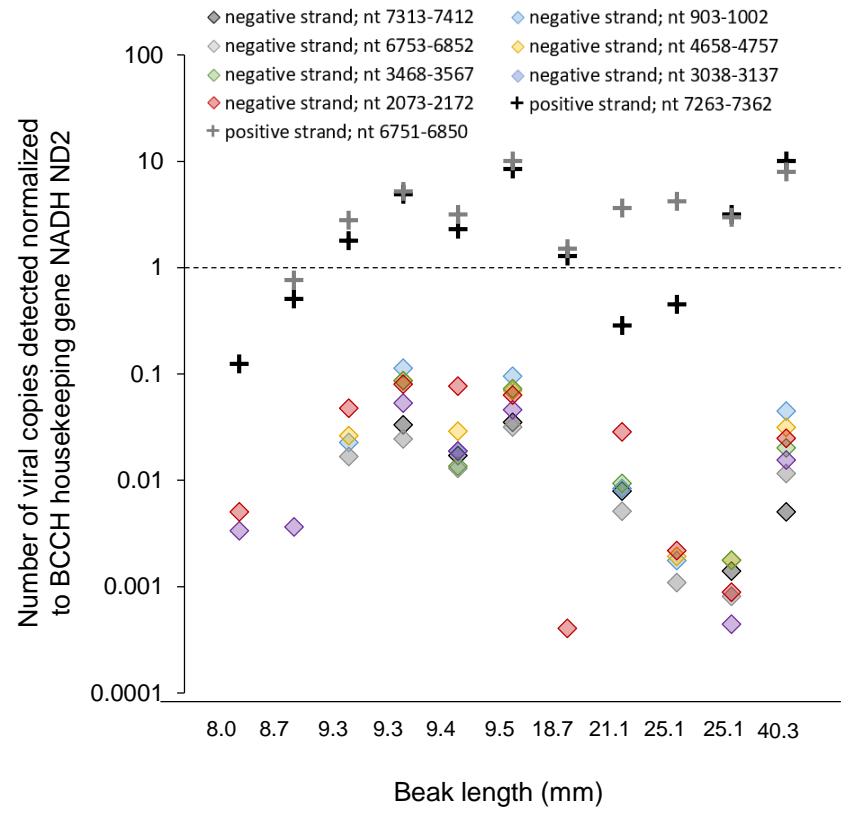

|                      | Positive overall | cloacal swab  | buccal swab  | blood sample | fecal sample |
|----------------------|------------------|---------------|--------------|--------------|--------------|
| AKD-affected         | 29/29 (100%)     | 28/29 (96.6%) | 3/29 (10.4%) | 0/13         | 0/4          |
| Asymptomatic control | 9/95 (9.5%)      | 5/95 (5.3%)   | 4/75 (5.3%)  | NA           | NA           |

Table 1: Efficacy of different non-terminal sampling methods for detecting Poecivirus in black-capped chickadees (*Poecile atricapillus*) exhibiting signs of avian keratin disorder (AKD-affected) and in asymptomatic controls. NA = not applicable.
